# Supplementary material
Source: PubMed Central journal article supplement (PMC9075598)
Supplement: NIHMS1782061-supplement-320436_Online.pdf [file NIHMS1782061-supplement-320436_Online.pdf]

## **SUPPLEMENTAL MATERIAL**

### **DETAILED METHODS**

#### **Human Coronary Artery Disease Subjects**

All human subjects were recruited for study through the Cardiac Catheterization laboratory at the University of Virginia. Patients were excluded if they had: any acute illness, type 1 diabetes, current acute coronary syndrome, autoimmune disease or on immunosuppressive therapy, prior organ transplantation, anemia, pregnancy, and HIV infection. No patient was on anticoagulation or had deep vein thrombosis or pulmonary embolism. All participants provided written informed consent before enrollment, and the study was approved by the Human Institutional Review Board. Peripheral blood was obtained from these participants prior to catheterization.

#### **Healthy Human Volunteers**

Peripheral blood from healthy volunteers were obtained after providing with written informed consent. The study was approved by the Human Institutional Review Board at University of Virginia.

#### **Mice**

All animal protocols were approved by the Animal Care and Use Committee at the University of Virginia. Id3<sup>fl/fl</sup> mice were a generous gift from Dr. Yuan Zhuang at Duke University. CD19<sup>Cre/+</sup> mice were provided by Dr. Bender (University of Virginia). C57BL/6J mice were purchased from Jackson Laboratory. These mice were housed on coconut husk bedding, and were either fed a standard chow diet or a Western diet. All

the mice utilized in all the experiments were 8-10 weeks old female mice. The mice were healthy through the course of the study. Female mice were used rather than male mice as female mice have been historically underutilized to understand pathogenesis of atherosclerosis. The sample size of the mice used in this study was determined based on previously published data<sup>10,14-16</sup> from the related assays instead of power calculation as the data from the same exact assays were not available. To avoid differences arising from cage to cage variation in mouse experiments, each cage had at least one mouse from each experimental group, but otherwise, experimental groups were allocated randomly, and investigators were blinded to group allocation when performing all data collection.

### **Cell Preparations for Murine and Human flow cytometry**

Peritoneal cavity cells were processed for flow cytometry or fluorescence activated cell (FAC) sorting as previously described<sup>9</sup>. Antibody titrations were performed to validate the antibodies and determine optimal concentrations. Fluorescence minus one (FMO) controls were utilized to distinguish target staining from background. Isolation of human PBMCs was performed as previously described<sup>9</sup>. Clone and fluorophore information as well as IgG isotype controls for flow cytometry antibodies were provided in supplementary table 3.

## **Samples preparation of Bulk RNA sequencing**

Sort-purified peritoneal B1a and B1b obtained from Id3KO and Id3WT C57BL/6 mice were RNA extracted by using Qiagen RNeasy Plus kit. The purified RNAs were stored at -80°C and sent to a Novogene to perform sequencing.

## **Differentially expressed genes and pathway analysis**

RNA sequences in raw FASTQ data files were obtained from Novogene and HISAT2/Stringtie/Ballgown pipeline was utilized for RNASeq analysis. Sequencing reads were aligned to reference genome (GRCm38/mm10) using HISAT2 (<https://github.com/infphilo/hisat2>). The annotated sequences were then quantified and assembled by using StringTie (<https://github.com/gpertea/stringtie>), and differentially expressed genes were analyzed using R Ballgown package (<https://bioconductor.org/packages/release/bioc/html/ballgown.html>). The codes to run the pipeline can be obtained from the previously published protocol<sup>17</sup>. Volcano plots of differentially expressed genes were visualized by using the python bioinfokit package. Ingenuity Pathway Analysis was performed on all the annotated RNA to analyze for differentially regulated cellular processes, canonical pathways and network analysis.

## ***In Vitro* and *In Vivo* Cell Proliferation Assay**

Peritoneal cavity cells were enriched for B cells using the EasySep Mouse Pan-B cell enrichment kit (STEMCELL, catalog #19844).  $1 \times 10^6$  B cells were then incubated with 5uM Celltrace-violet in 200uL B cell culture media (RPMI + 10%FBS + 10mM HEPES, 1mM Na-pyruvate + 10ug/mL Gentamycin + non-essential amino acid) for 20 minutes at

37°C, and then washed with FACS buffer (1% FBS, 0.1%NaN<sub>3</sub> in PBS). Labeled cells were cultured in B cell culture media for 3 days with 20ng/mL recombinant BAFF or PBS control to measure *in vitro* proliferation. For *in vivo* proliferation, sort-purified 2x10<sup>5</sup> of p62gRNA-ATTO+ Celltrace-violet+ B1 cells were resuspended in 100uL DPBS and intraperitoneally transferred into C57BL/6 mice.

### **Lentiviral Production and p62 Overexpression on mouse B cells.**

P62-eGFP lentivirus was generated using pLV-eGFP vector (purchased from Addgene) and mouse p62 was subcloned into the vector. The eGFP or P62-eGFP lentiviruses were generated using four plasmid system by co-transfecting pLV-eGFP or pLV-P62-eGFP plasmid along with pLP1(Gag-Pol vector), pLP2 (Rev vector), and pVSV-G (VSV-G vector) plasmids into 293T cells. The eGFP ctrl and P62-eGFP lentiviruses were used to transduce enriched peritoneal mouse B cells at multiplicity of infection (MOI) of 50 by using 5ug/mL polybrene and spinning at 1000g for 60 mins. Transduced murine B cells were harvested 48 hrs post transduction and FAC-sorted for GFP+ B1 cells to be used for adoptive transfer. Approximately 25-30% of B-1 cells were successfully transduced by this method.

### **P62 CRISPR/sgRNA Knockout and Pp62-GFP transfection on Mouse B cells.**

crRNA molecule-targeting exon of p62 (UUGUAGCGGGUCCUACCAC-PAM AGG) was purchased from IDT and conjugated with tracrRNA-ATTO. Pp62-GFP plasmid was generated by subcloning 1000bp of p62 promoter to replace CMV promoter in CMV-GFP plasmid purchased from Addgene. Murine peritoneal cells were enriched for B

cells using the EasySep Mouse Pan-B cell enrichment kit (STEMCELL), cultured in B cell culture media, and stimulated with 50ng/mL LPS overnight. The stimulated B cells were then nucleotransfected with Cas9 ribonuclear protein and pre-conjugated p62 crRNA-tracrRNA ATTO, Pp62-GFP, or CMV-GFP ctrl plasmid using the P3 Primary cells Nucleofection Kit purchased from Lonza. B cells were collected for analysis and sorting 24 hrs after nucleofection.

### **Nucleofection of Engineered Plasmids into Human B cells.**

Cryopreserved PBMCs obtained from healthy donors were thawed and washed with warm complete media (RPMI supplemented with 5% FBS, 1 mM sodium pyruvate and Pen-Strep) with 95-98% cell viability. B cells were enriched using EasySep human pan-B cell enrichment kit (STEMCELL) with 10-15% of the total PBMCs. CMV-E12-Flag, CMV-E47-Flag were generated using CMV-Flag plasmid to subclone human E12 and E47 into. These plasmids were nucleotransfected into  $2 \times 10^6$  unstimulated enriched human B cells per each plasmid construct using the P3 Primary cells Nucleofection Kit purchased from Lonza. B cells were collected for analysis and sorting 24 hrs after nucleofection.

### **Quantification of markers colocalization by using imaging flow cytometry**

Murine peritoneal cells obtained from Id3KO and Id3WT mice were enriched for B cells. The enriched B cells were incubated with 20ng/mL murine recombinant BAFF or PBS control for 12 hrs in B cell media. Prior to running on the Imagestream imaging flow cytometry machine, cells were stained with B220-BV421, CD5-PE, and CD19-PECF594

using previously developed surface staining protocol<sup>9</sup> following with permeabilization and intracellular staining of p62-AF488 and TRAF6-AF647 antibodies using FIX & PERM Cell Permeabilization Kit (Invitrogen). Images of 1000 Id3KO or Id3WT B1b cells from both unstimulated, BAFF stimulated conditions were collected, and quantitative colocalization analysis was performed using Amnis Imagestream colocalization software.

### **ELISA for Quantification of Total and Anti-OSE IgM or IgG Isotypes in Mice and Humans**

Total IgM subtypes in mouse plasma were measured using colorimetric ELISA as described previously<sup>9</sup>. Levels of IgM and IgG against the MDA mimotope<sup>18</sup>, a peptide mimotope of MDA-LDL (peptide sequence: HSWTNSWMATFL), in human plasma were measured by chemiluminescent ELISA as previously described<sup>18</sup>. For the detection of antibodies, plasma was diluted at 1:100 dilution.

### **Adoptive Transfer**

Celltrace violet<sup>+</sup> or eGFP<sup>+</sup> (eGFP-ctrl or p62-eGFP) B1 (CD3-CD19+B220-) cells were sort-purified. After sorting,  $2 \times 10^5$  of these cells were adoptively transferred into C57BL/6 host mice intraperitoneally. Mice adoptively transferred with Celltrace-violet<sup>+</sup> cells were fed a chow diet for 2 weeks. Mice adoptively transferred with eGFP-ctrl or p62-eGFP B1 cells were fed with Western diet for 8 weeks. After 2 weeks or 8 weeks, mice were sacrificed and cells from the peritoneal cavity were processed for flow cytometry as previously described<sup>9</sup>. For western diet fed mice, aortas were harvested and stained using Sudan IV as previously described<sup>9</sup>. Flow cytometry was used to quantify for

number of B1a and B1b cells as well as degradation of Celltrace-violet signal of harvested cells obtained from C57BL/6 mice.

### **Analysis of Atherosclerotic Lesions**

Hearts and aortas were harvested as previously described<sup>10</sup>. Briefly, hearts were embedded in optimal cutting temperature compound (Tissue-Tek) and snap frozen. Serial 5- $\mu$ m sections were cut by Cryostat (Leica Biosystems) from the beginning of the 3 aortic leaflets to the aortic arch and stained using Oil Red O (Sigma) as previously described<sup>10</sup>. Aortas were fixed in 4% paraformaldehyde then opened longitudinally, pinned, and stained using Sudan IV (Sigma) as previously described<sup>10</sup>. Plaque areas were assessed using Image-Pro Plus software (Media Cybernetics). The analysis was done by the lab specialist without knowing the group allocation.

### **Statistics**

Statistics were performed using GraphPad Prism Version 7.0a (GraphPad Software, Inc), Python 3.0, R 3.6.1, or SAS 9.4. Results from all replicated experiments are displayed, and bar graphs display mean $\pm$ SEM. Nonparametric test with two-sided p values, Mann-Whitney test, was used to determine statistical significance for comparing between two groups. For comparing more than two groups of data, one-way ANOVA for non-parametric data, Kruskal-Wallis test was used. Following Kruskal-Wallis test, post hoc Dunn was run to correct for multiple comparisons. Spearman was used to determine correlation coefficient, and false discovery rate (FDR) method was used to perform p-value corrections for DEG analysis. Normality and equal variance were not assessed as a precondition for the analyses. Data were represented as mean  $\pm$  SD. P

values and the specific statistical methods used were specified in figures and figure legends.



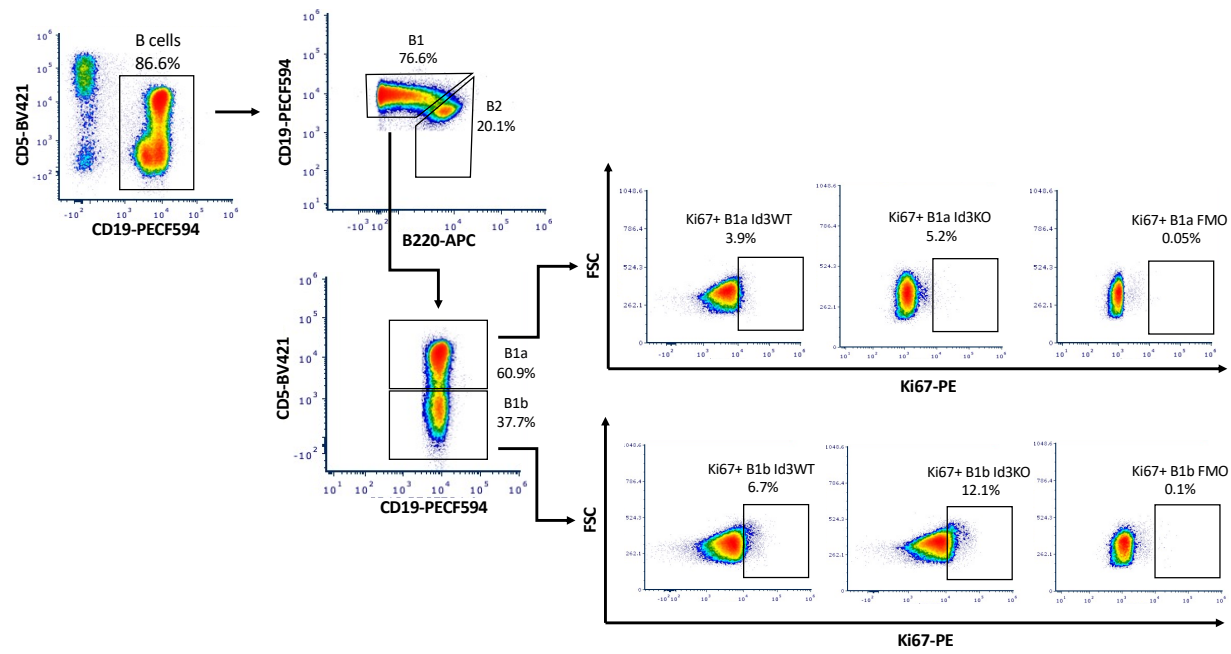

Figure S1: Gating strategy of B1a and B1b as well as Ki67+ population.

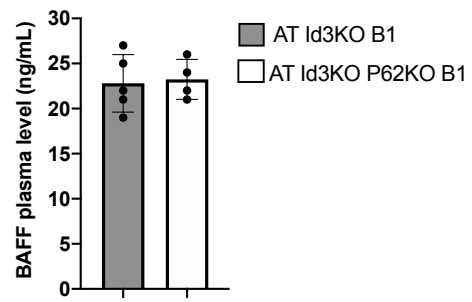

**Figure S2:** BAFF level in the plasma of mice receiving Id3KO B1 cells (n = 5) or Id3KO p62KO B1 cells (n = 4) 2 weeks post adoptive transfer

TGTTGGAGAGAAAGCCTAAACTGGGATTGCTCTGGGGCAATAGGTGTACCTTCTAGCCACCAGGGAAATGGCAGTCA  
CACCTG GTGGCAATCACTGTCCATTGCTGAGTTTTCTAAAAATACAGATTTTTCTGCTCTCAAAAACCAATTCTGAGAGAG  
GTCCAGGGAAACATGATAACTGGGAGAGGGGCCCTAGGAAGCTGGTGGAGACCCTGCCTCAGGGAGACGACTTGAGCTC  
CAATTCTGCCCTGCATGCTTCTCCCATGACTTTGACTCAGCAGGCTAGTCCATGGAAAGGACCATACCTAGAAGGCCCTACA  
GGGTGACACCCTCTCAGCTCTAGCCCTCCCAAGGACTGGGTTCTGCTAAAGAGCTATTACTTTATTCTTTAAATTTGGTT  
TGTTTTTATTTTTCCCTGAGACAGGGTTGCTCTGTGTAGCCCTGGCTGTCTGGAACTCACTCTGTAGACCAGGGCTGGCCTGAA  
CTCAGAAATCACTGCTCTGCCCTCCCAAGTCTGGGGTTAAAGGCATGTGCCACCACCTGCCCTGCTAAATTTGTTTTTTG  
AGAGTAGGACTTGTATGCAAGCTGGCCGAGCCTTGAATTAGAATTCTTGTACTCAGCTTCCAAGGGCTGGGGTACAGA  
TGTGTGTATCATGTAGTACACAGGTCACTGTGGCACAAGAAAGCAGCATTTCTGGTTTTGGCGTTGTATTGGGGTTGAA  
CCTAAGATGTAACACATACTAGGCAGGTGCTGTCTGACTGAGCTATATCCCTATGCACAAATCCCAATTAATGATATCTCCCG  
GTATATCCCTACTAAGCTAAATCCTCATGACCTGATCCCTCAAGCTAAATCTCTATAAGCTGATCCCTAAGCTAAATCT  
CCTGTATCCTTACTAAACTGTATAGCCAGATCTTTAATCCCGCCCCAGCACCCAGACTTTTTTTCTTTAGAAAGCCTCATGC  
AGCCAAGGCTGGCTTGAAGCTCTGGAACCTCTGACCTCCCAAGTACTAGGATCACTTCTATTTGAAACAGTTTCAACCAAGTTG  
CTCAAGCAGAAATCTTGAACCTGGCTTTTTCTGCTCAGCACCTCAAAGCTGSAATAACCACTGTGGCACAGGACTGG  
CTATAGCTTGTATTTGGTTCTAGATGGAGGGCAGGTGCTGATCCCTTTGTGCTTTGAAGCCAATAAGCCTGAGATACAT  
GTACCTTCCGAGAGAGAGAGAGAGAAAGAGAGAGAGAGAGAGAGAGAGAGAGAGAGAGAGAAATGAATGTGTGTGTA  
TGTGTGTGTGTCTGGCTGCAGTGAGGAATCTGTGGTGAATGAACAGTTGTGACTACTGCTGCCTGGAGCCCTGGCT  
ACCCCTCTACAGGGTGGTTGTGAGAAGTCAACAGTCTTGTGCAACACCTCTCAACCTGATCTTTGTAATGGGTGAGGC  
CTAAGATGGTGGTGTATGTTCTTTATTCAGTGAGGGCTGGTATGGTGGATGCCTGGAAAGGGGTGGAGTGGGGGTAC  
TACCGGGACACTATGTTAGGAGGGTCCGAATAGCATCTGTGAGACAGCCTGTTGGCTAAAAGAAATGGCTACTGACAGT  
AGA CACTG TGTCTCTAGCTTCTGGCCGTACATCCCCCTGGCTTGGGGACGACACTGCTGAGTCAAGGGCAGGCCAAAGC  
CTGGGAGGTACCTAGGCTCGATACTTACGGGTCTTTTCCCAACGACTTGAGGCTGAGGCTGCTCTTGTGGTCAACCATGTA  
TTGGTGGGAAAGAAAAGGTAGGCAGTGGGGTCTCTGACCCCGTACCTTCAAGGGTCCCATCAAGGGGCTCCAGCGG  
CCGCCAGCTAGGGAGGGGGGGCTCATAGAGGCTCCGCCACGAGGGCGGG

**Figure S3:** E-box sequences (CANNTG) located in p62 promoter region (yellow).

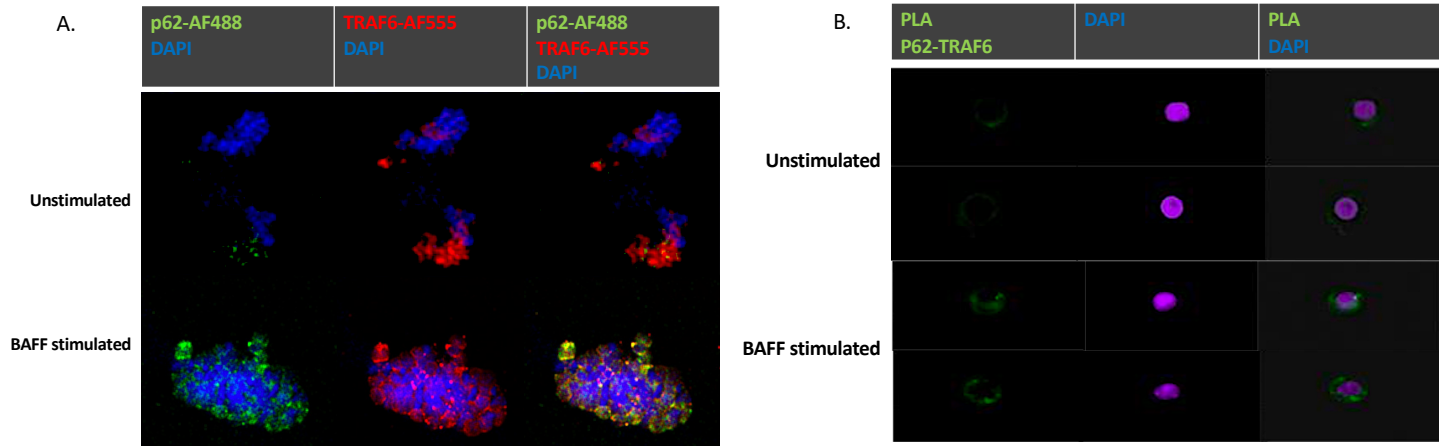

**Figure S4:** **A,**Confocal imaging of p62 and TRAF6 colocalization. **B,** Visualization of interaction p62 and TRAF6 through PLA assay with and without BAFF stimulation.

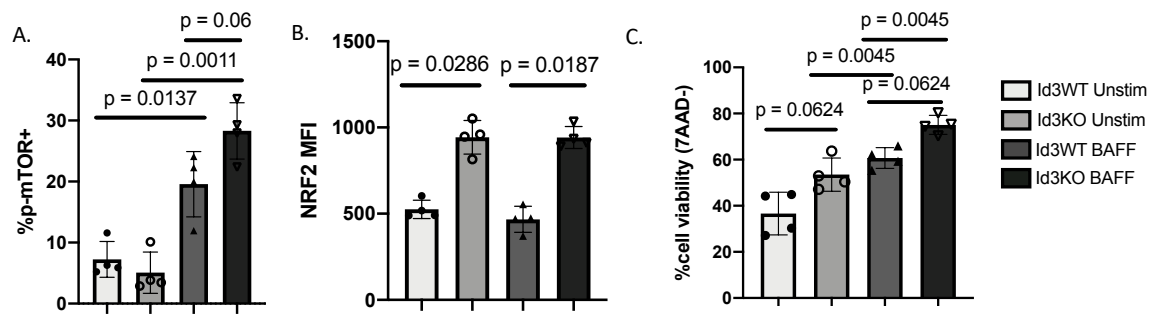

**Figure S5: A-C,** Flow cytometry quantifying percentage of p-mTOR+ population (**A**), MFI of NRF2 (**B**), and percentage of cell viability measured as 7AAD- population (**C**) in Id3WT and Id3KO B1b cells with and without BAFF stimulation (n = 4 per group).

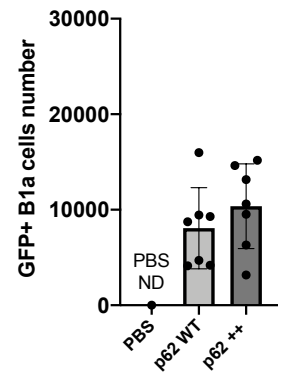

**Figure S6:** Number of recovered GFP+ B1a cells (n = 4 for PBS group; n = 7 for p62WT group; n = 6 for p62++ group) 8 weeks post adoptive transfer

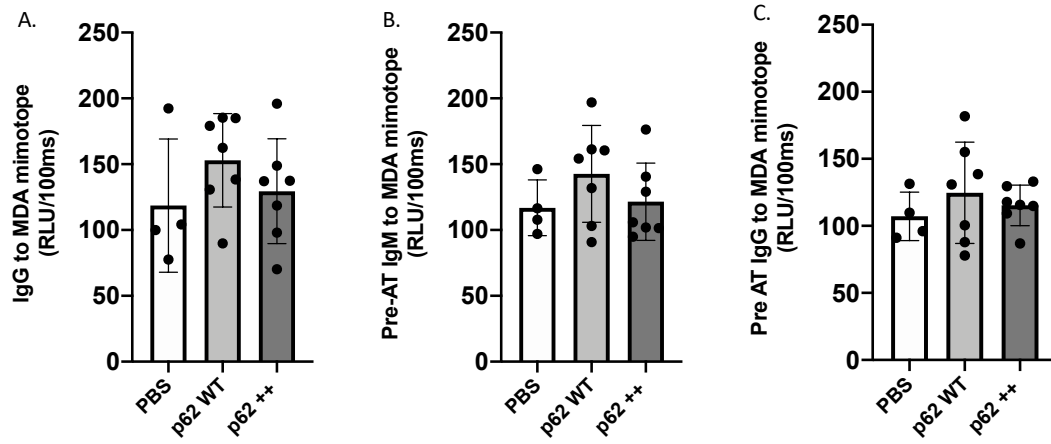

**Figure S7: A-C**, Plasma IgG to MDA-mimotope level (A) 8 wks post transfer and WD fed, pre-adoptive transfer plasma IgM to MDA-mimotope (B), and pre-adoptive transfer IgG to MDA-mimotope (C) measured by ELISA obtained from PBS (n =4), p62WT (n = 7) and p62++ (n =6) AT groups.

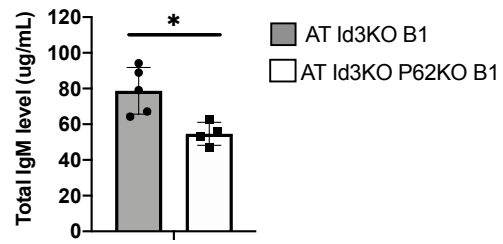

**Figure S8:** Plasma total IgM level 2 wks post transfer measured by ELISA obtained from AT of Id3KO (grey, n = 5) and Id3KO p62KO (white, n = 4) B1 cells into C57BL/6 host mice.



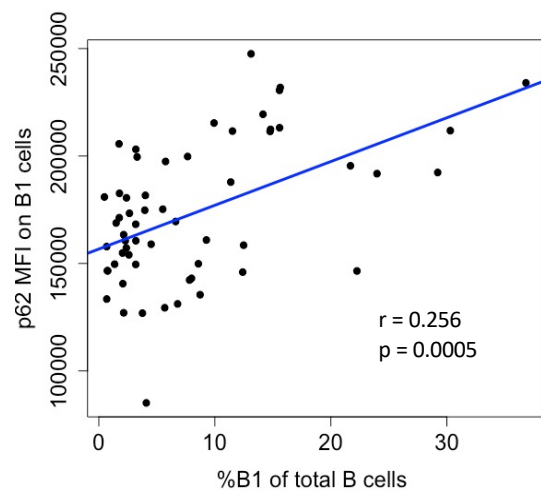

**Figure S9:** correlations between human B1 frequency and p62 expression in B1 cells (n = 58)

**Table S3:** Flow cytometry antibodies used for sorting, analyzing B cells from *in vitro* culture and tissue harvest.

| Fluorophore  | Clone    | Manufacturer   | Catalog#   | Antigen             |
|--------------|----------|----------------|------------|---------------------|
| PE-CF594     | 1D3      | BD Bioscience  | 562291     | CD19                |
| AF700        | O323     | Biolegend      | 152316     | CD3                 |
| BV421        | 53-7.3   | BD Bioscience  | 562739     | CD5                 |
| PE           | 53-7.3   | BD Bioscience  | 553022     | CD5                 |
| APC          | RA3-6B2  | Invitrogen     | 14-0452-82 | B220                |
| BV421        | RA3-6B2  | Invitrogen     | 562922     | B220                |
| AF488        | EPR4844  | Abcam          | ab185015   | p62                 |
| AF647        | EP591Y   | Abcam          | ab214941   | TRAF6               |
| PE           | MFRDTRK  | Invitrogen     | 12-9036-41 | IKBa                |
| AF555        | Y69      | Abcam          | ab32072    | c-myc               |
| PE           | 7H22-E16 | Biolegend      | 316906     | BAFFR               |
| PE           | 16A8     | Biolegend      | 652404     | Ki-67               |
| PE           | MRRBY    | Thermo Fisher  | 12-9718-42 | p-mTOR              |
| PE           | D1Z9C    | Cell Signaling | 14409S     | NRF2                |
| Unconjugated | SP137    | Invitrogen     | MA5-16384  | IgG Isotype control |
